# Supplementary material for: Preparation and chromatographic evaluation of a mixed polymer brush–silica stationary phase with temperature-sensitive property
Source: Royal Society of Chemistry journal article supplement (doi:10.1039/d3ay01173a), 2023-01-01
Supplement: d3ay01173a1.pdf [file d3ay01173a1.pdf]

## **Preparation and chromatographic evaluation of mixed polymer brush-silica stationary phase with temperature-sensitive property**

**Yan Li<sup>1</sup>, Xiaofan Tang<sup>1</sup>, Yinhai Li<sup>1</sup>, Weilong Zhao<sup>1</sup>, Shengwei Guo<sup>2</sup>, Chunmiao Bo<sup>1\*</sup>**

<sup>1</sup> *School of Chemistry and Chemical Engineering, Key Laboratory for Chemical Engineering and Technology, State Ethnic Affairs Commission, Ningxia Key Laboratory of Solar Chemical Conversion Technology, North Minzu University, Yinchuan 750021, China.*

<sup>2</sup> *College of Materials Science and Engineering, North Minzu University, Yinchuan 750021, China.*

\* Corresponding author: Chunmiao Bo

No. 204 Wenchang North Street, Xixia District, Yinchuan City, China

Email: bocm-001@163.com

Tel: +86-0951-2067917

Fax: +86-0951-2067917

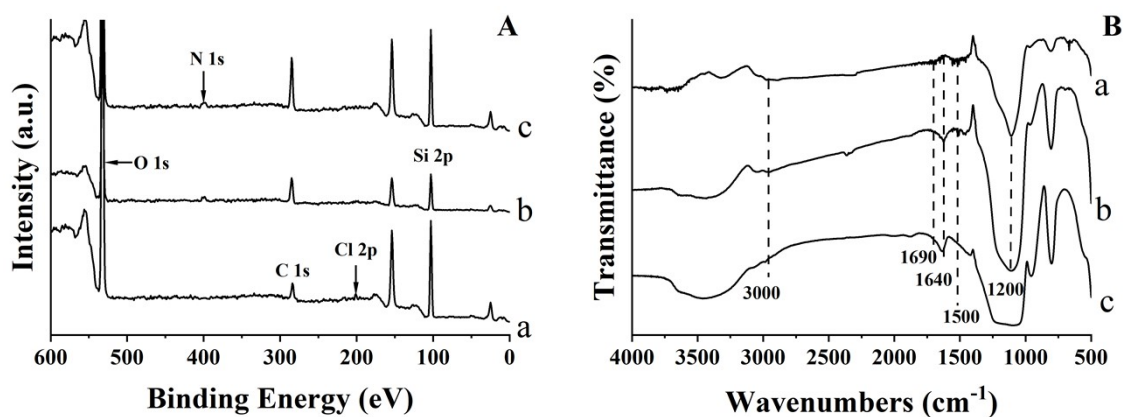

**Fig. S1.** XPS spectra (A) and FT-IR spectra (B) of silica@Cl (a), silica@poly(Qun) (b) and silica@poly(Qun-co-VCl) (c).

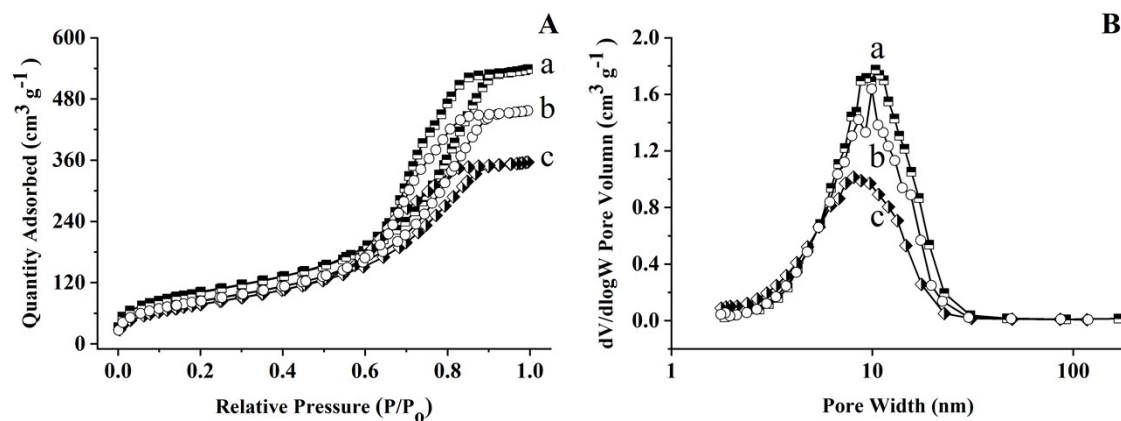

**Fig. S2.** N<sub>2</sub> isothermal adsorption graphs (A) and BJH adsorption average pore size (D) of silica (a), silica@poly(Qun) (b) and silica@poly(Qun-co-VCl) (c).

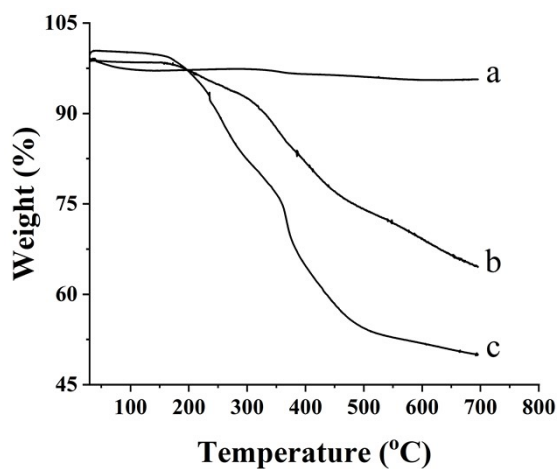

**Fig. S3.** TGA spectra of silica (a), silica@poly(Qun) (b) and silica@poly(Qun-co-VCl) (c).

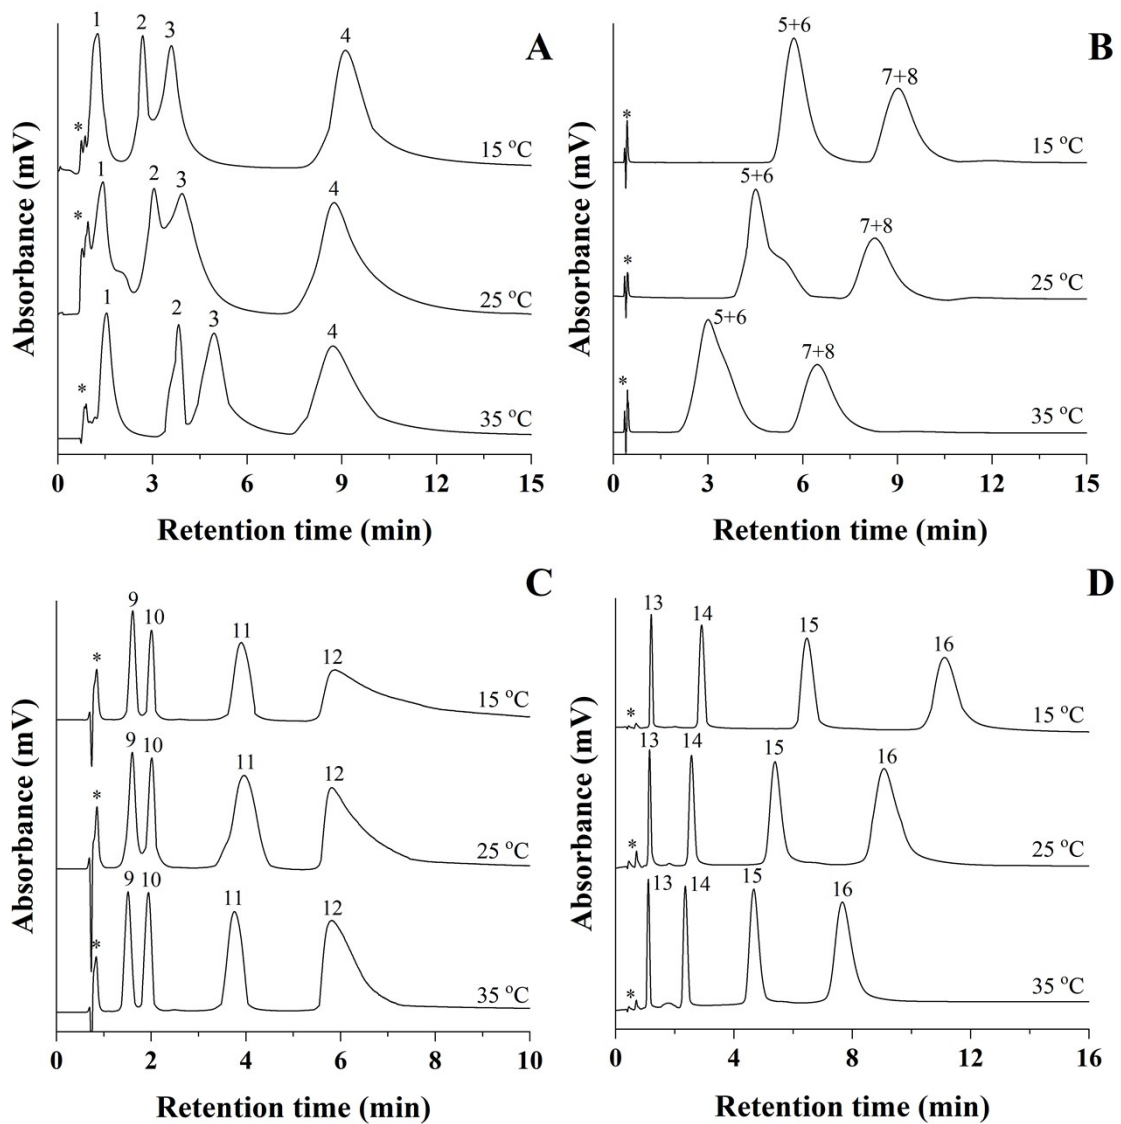

**Fig. S4.** Silica@poly(Qun): nucleoside (A), organic acids (B),  $\beta$ -agonists (C) and PAHs (D) retention time at various temperature. Other chromatographic conditions are consistent with **Fig. 5**.

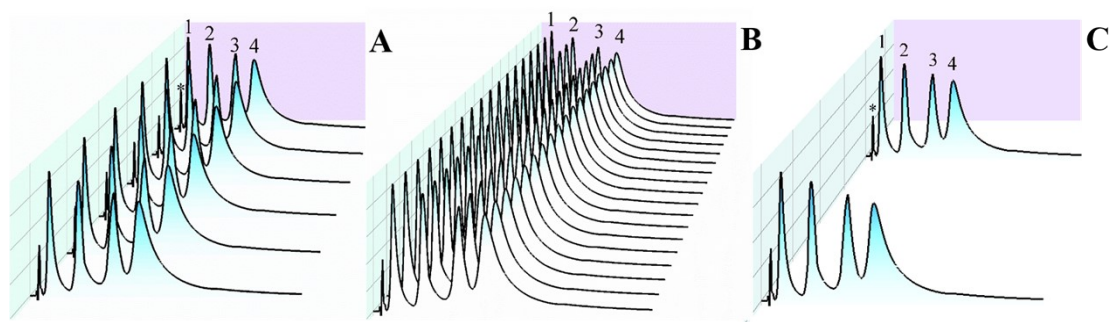

**Fig. S5** Intra-day reproducibility (A) and inter-day reproducibility (B) of silica@poly(Qun-co-VCl) column. Chromatogram of nucleosides on silica@poly(Qun-co-VCl) column at the initial injection and at the injection used for 3 months (C). Analytes: 1, uracil, 2, adenine, 3, cytosine, 4, guanine. The chromatographic conditions were the same as in **Fig 2C**.

**Table S1** Elemental analysis data of silica, silica@poly(Qun) and silica@poly(Qun-co-VCl).

| Materials               | Elemental analysis (%) |      |      |
|-------------------------|------------------------|------|------|
|                         | C%                     | H%   | N%   |
| silica                  | 1.50                   | 0.80 | 0.00 |
| silica@poly(Qun)        | 6.88                   | 0.82 | 0.49 |
| silica@poly(Qun-co-VCl) | 11.38                  | 1.05 | 0.74 |

**Table S2** The mean pore size, pore volume and  $S_{\text{BET}}$  for silica, silica@poly(Qun) and silica@poly(Qun-co-VCl).

| Adsorbent               | $S_{\text{BET}}$               | Pore volume                     | Mean pore size |
|-------------------------|--------------------------------|---------------------------------|----------------|
|                         | ( $\text{m}^2 \text{g}^{-1}$ ) | ( $\text{cm}^3 \text{g}^{-1}$ ) | (nm)           |
| silica                  | 365.1                          | 0.84                            | 8.55           |
| silica@poly(Qun)        | 312.9                          | 0.71                            | 8.01           |
| silica@poly(Qun-co-VCl) | 292.0                          | 0.56                            | 6.72           |
